# Supplementary material for: Photocatalytic evolution of nitrous oxide from nitric monoxide over Pt-loaded titanium dioxide under UV irradiation
Source: Royal Society of Chemistry journal article supplement (doi:10.1039/d5re00119f), 2025-01-01
Supplement: d5re00119f1.pdf [file d5re00119f1.pdf]

## Supporting Information

### Photocatalytic Evolution of Nitrous Oxide from Nitric Monoxide over Pt-loaded Titanium Dioxide under UV irradiation.

Ryo Asayama,<sup>a\*</sup> Masanori Takemoto,<sup>a\*</sup> Arata Suzuki,<sup>a</sup> Ryuichi Watanabe,<sup>a</sup> Fuminao Kishimoto,<sup>a</sup> Kenta Iyoki,<sup>abc</sup> Tatsuya Okubo,<sup>a</sup> Toru Wakihara<sup>ad#</sup>

<sup>a</sup> Department of Chemical System Engineering, The University of Tokyo, 7-3-1 Hongo, Bunkyo-ku, Tokyo 113-8656, Japan

<sup>b</sup> Precursory Research for Embryonic Science and Technology (PRESTO) Japan Science and Technology Agency (JST), Kawaguchi, Saitama 332-0012, Japan

<sup>c</sup> Department of Environment Systems, The University of Tokyo, 5-1-5 Kashiwanoha, Kashiwa-shi, Chiba 277-8563, Japan.

<sup>d</sup> Institute of Engineering Innovation, The University of Tokyo, 2-11-16 Yayoi, Bunkyo-ku, Tokyo 113-8656, Japan

\* Equally contributed

# Corresponding author

|                                     |   |
|-------------------------------------|---|
| Preparation of photocatalyst        | 2 |
| Characterization                    | 3 |
| Photocatalytic activity measurement | 4 |
| Figure S1                           | 5 |
| Figure S2                           | 5 |
| Figure S3                           | 6 |
| Figure S4                           | 6 |
| Table S1                            | 7 |
| Reference                           | 8 |

# Preparation of photocatalyst

Titanium dioxide (P25,  $\text{TiO}_2$ ) used in this paper was purchased from Sigma-Aldrich, which is a mixture of anatase and rutile types. Prior to Pt loading,  $\text{TiO}_2$  was calcined at  $400^\circ\text{C}$  (1 h to raise and 5 h to keep) to remove impurities. Hydrogen hexachloroplatinate (IV) hexahydrate ( $\text{H}_2\text{PtCl}_6 \cdot 6\text{H}_2\text{O}$ , Wako) was used as a platinum source. Platinum was loaded on the calcined P25 by three methods, such as photo-deposition, [1] impregnation [2] and chemical reduction. [3]

## ***Photo-deposition method***

0.5 g of calcined  $\text{TiO}_2$  was dispersed in mixture of water (900 mL) and methanol (100 mL). 24.1 mg of  $\text{H}_2\text{PtCl}_6 \cdot 6\text{H}_2\text{O}$  was added and the mixture was irradiated with light while stirring at room temperature. The wavelength of the light was 300–800 nm and the light intensity was 100% (HAMAMATSU L9588-04). After the solution turned into black, the mixture was washed, filtered, and dried  $80^\circ\text{C}$  overnight. This photocatalyst was denoted as “Pt/ $\text{TiO}_2$ -pd”.

## ***Impregnation method***

1.0 g of calcined  $\text{TiO}_2$  and 48 mg of  $\text{H}_2\text{PtCl}_6 \cdot 6\text{H}_2\text{O}$  were dispersed in 25 mL water and heated with stirring at  $60^\circ\text{C}$  for 24 h. The resultant solid was crushed and calcined at  $500^\circ\text{C}$ . The obtained sample was calcined at  $400^\circ\text{C}$  for 2 h under hydrogen flow. This photocatalyst was denoted as “Pt/ $\text{TiO}_2$ -imp”.

## ***Chemical reduction method***

0.8 g of  $\text{TiO}_2$  was dispersed in 500 mL of ethylene glycol. The solution was heated to  $160^\circ\text{C}$  with stirring, and 38 mg of  $\text{H}_2\text{PtCl}_6 \cdot 6\text{H}_2\text{O}$  was added with a small amount of water. The solution was then washed, filtered, and dried overnight. This photocatalyst was denoted as “Pt/ $\text{TiO}_2$ -cr.”

# Characterization

The crystallite structure was analysed by SmartLab X-ray diffractometer (Rigaku). Crystalline sizes of TiO<sub>2</sub> were calculated by Scherrer's equation (equation S1).[4] The calculated values were shown in Table S1.

$$D = \frac{k\lambda}{\beta \cos \theta} \quad (\text{Eq. S1})$$

where  $D$  is the crystallite size (nm),  $k$  is a constant (0.90 for this paper),  $\lambda$  is the wavelength of the X-ray radiation,  $\beta$  is the full width at half maximum (FWHM) of the intense and broad peaks, while  $\theta$  is the Bragg's or diffraction angle.

UV-Vis spectra was measured by a UV-Vis spectrophotometer (JASCO, V-670). Transmission Electron Microscope (TEM) images and Pt particle size was measured by JME-2100 (JEOL). Pt content in photocatalysts was calculated from X-ray fluorescence spectroscopy (XRF) spectra. The XRF measurements were carried out using EA1400 (Hitachi). The dispersion of Pt particle was measured by BELCAT II (MICROTRAC MRB) using CO-pulse, and particle size was calculated from equation S2.

$$d = \frac{6000}{A_m \times \rho} \left( A_m = \frac{V \times SF / 22414 \times 6.02 \times 10^{-23} \times \sigma_m \times 10^{-18}}{c} \right) \quad (\text{Eq. S2})$$

where  $d$  is particle size,  $\rho$  is the metal density,  $V$  is the absorption volume,  $SF$  is the stoichiometric factor,  $\sigma_m$  is metal cross-sectional area of one atom and  $c$  is the metal weight.

## Photocatalytic activity measurement

The photocatalytic test was conducted using a home-made, fixed-bed reactor. The reactor was composed of a quartz tube of 4 mm (with an inner diameter) covered by an electric furnace and a 300 W Xenon lamp (Asahi Spectra MAX-303). Flow rate was controlled by a mass flow controller. The top surface of the quartz tube was covered with a quartz plate to allow light (at wavelengths of 300-600 nm) to pass through. When calculating AQY (Apparent quantum efficiency), 365 nm cutoff filter (Asahi Spectra HQBP365-UV) was used. The photocatalyst powder (0.1 g) was fixed by quartz wool. The height of the photocatalyst placed on the quartz tube (the distance from the light source) was aligned for all measurements so that the intensity of irradiated light was constant. When water was introduced, the feed gas was passed through a water tank by a 4-way switching valve. Prior to the catalytic test, the photocatalyst powder was kept at 450 °C in 1% NO/He gas to remove carbon species in the photocatalysts, followed by cooling to 50 °C. Typically, the catalytic reaction was performed at 50 °C with 1% NO/He gas flowing at 10 cc·min<sup>-1</sup> as the feed gas, corresponding to at an SV of 3500 h<sup>-1</sup>. The concentration of N<sub>2</sub>O, O<sub>2</sub> and N<sub>2</sub> in the outlet gas was analyzed using a gas chromatograph (Shimadzu GC-2014) equipped with a thermal conductivity detector.

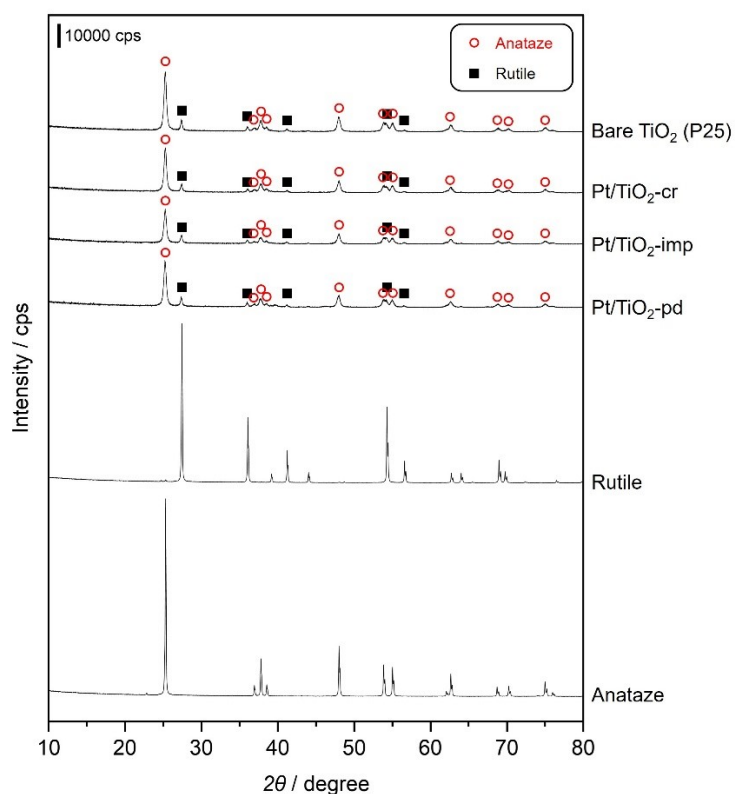

**Figure S1.** PXRD patterns of bare and Pt-loaded  $\text{TiO}_2$  prepared by various loading methods. Diffraction peaks of rutile and anatase were observed in PXRD pattern of bare  $\text{TiO}_2$  (P25), and there is no change in diffraction peaks after Pt loading.

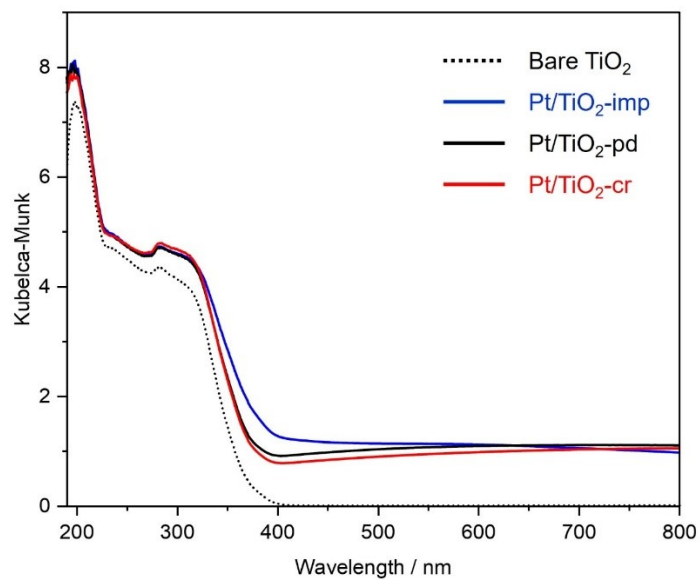

**Figure S2.** UV-Vis spectra of bare and Pt-loaded  $\text{TiO}_2$  photocatalysts.  $\text{TiO}_2$  has no absorption peak over 400 nm. After Pt loading, all of Pt-loaded  $\text{TiO}_2$  photocatalysts exhibited light adsorption in the visible-light region due to the surface plasmon resonance of Pt NPs.

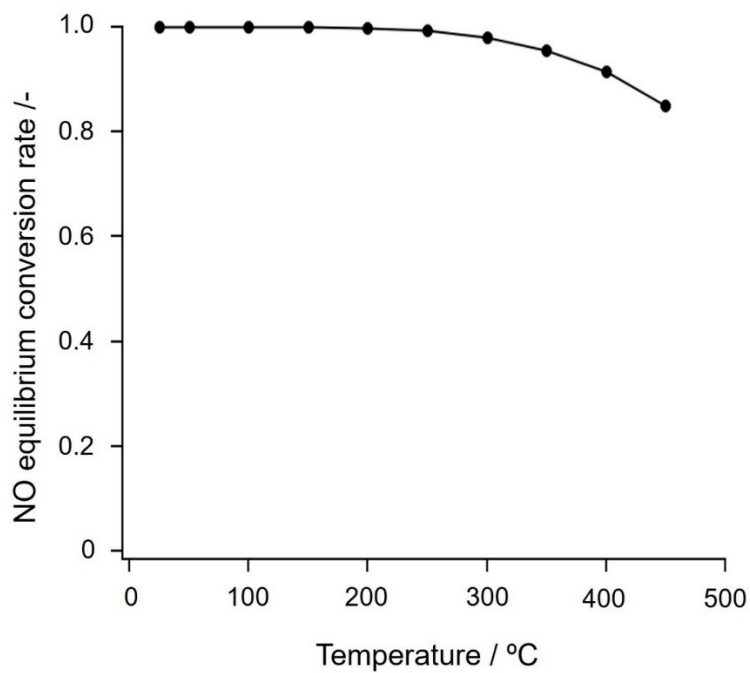

**Figure S3.** Calculated equilibrium conversion rate of NO for overall reaction ( $4NO \rightarrow 2N_2O + O_2$ ). The NO pressure before reaction  $P_{NO}$  is assumed to be  $P_{NO} = 1$  kbar.

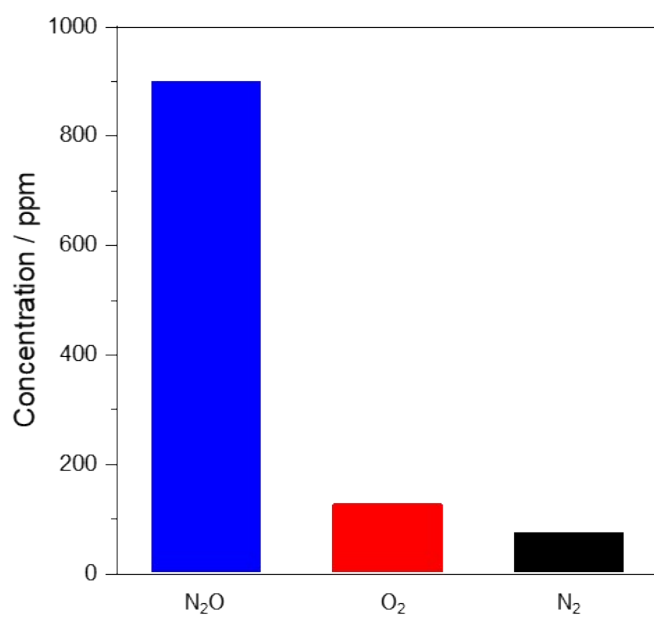

**Figure S4.** Gas evolution over Pt/TiO<sub>2</sub>-pd under UV irradiation at an SV of 170 h<sup>-1</sup>.

**Table S1.** Characteristics of bare and Pt-loaded TiO<sub>2</sub> photocatalysts.

| Photocatalyst            | Crystalline size of TiO <sub>2</sub> <sup>a</sup> |              | Pt size <sup>b</sup> | Pt size <sup>c</sup> | Dispersion <sup>c</sup> | Pt amount <sup>d</sup> |
|--------------------------|---------------------------------------------------|--------------|----------------------|----------------------|-------------------------|------------------------|
|                          | / nm                                              |              | / nm                 | / nm                 | / %                     | / wt%                  |
|                          | Anatase (101)                                     | Rutile (110) |                      |                      |                         |                        |
| TiO <sub>2</sub>         | 22                                                | 35           | -                    | -                    | -                       | -                      |
| Pt/TiO <sub>2</sub> -pd  | 21                                                | 34           | 2.8                  | 6.4                  | 17                      | 1.8                    |
| Pt/TiO <sub>2</sub> -imp | 21                                                | 33           | 1.9                  | 4.1                  | 27                      | 1.7                    |
| Pt/TiO <sub>2</sub> -cr  | 21                                                | 36           | 3.8                  | 6.8                  | 16                      | 1.7                    |

<sup>a</sup> calculated by Scherrer's equation.

<sup>b</sup> estimated from TEM image.

<sup>c</sup> determined by CO pulse technique.

<sup>d</sup> determined by XRF measurement.

# Reference

1. Clarizia, L., et al., *Effect of surface properties of copper-modified commercial titanium dioxide photocatalysts on hydrogen production through photoreforming of alcohols*. International Journal of Hydrogen Energy, 2017, **42**, 28349-28362.
2. Lee, S., et al., *Low-coordinated surface atoms of CuPt alloy cocatalysts on TiO<sub>2</sub> for enhanced photocatalytic conversion of CO<sub>2</sub>*. Nanoscale, 2016, **8**, 10043-10048.
3. Wang, C., et al., *Platinum-nanoparticle-modified TiO<sub>2</sub> nanowires with enhanced photocatalytic property*. ACS Appl. Mater. Interfaces, 2010, **2**, 3373-3377.
4. Mustapha, S., et al., *Facile synthesis and characterization of TiO<sub>2</sub> nanoparticles: X-ray peak profile analysis using Williamson–Hall and Debye–Scherrer methods*. International Nano Letters, 2021, **11**, 241-261.
